# Supplementary material for: Prevalence of temporomandibular disorder in children and adolescents with juvenile idiopathic arthritis – a Norwegian cross- sectional multicentre study
Source: Springer Nature journal article supplement (doi:10.1186/s12903-020-01234-z), 2020-10-13
Supplement: MOESM1 [file 18479332]

Supplementary Table S1. Reliability tests between “a reference” and the examiners.

Reliability (intraclass correlation coefficients (ICCs)) for opening, lateral, and protrusive movements (mm). Test 1 (2015 Jan) shows ICC values between “a reference” and the examiner who examined the first participants included in the study. Test 2 (2015 Sep), Test 3 (2017 Feb), and Test 4 (2017 Nov) are all based on ICC values between “a reference” and other examiners. The ICC values reported are average measurements. For ICC interpretation, see <https://www.ncbi.nlm.nih.gov/pmc/articles/PMC4913118/>.

|                                                       | Test 1             | Test 2            | Test 3            | Test 4             |
|-------------------------------------------------------|--------------------|-------------------|-------------------|--------------------|
| <b>Opening movements</b>                              |                    |                   |                   |                    |
| Pain-free opening                                     | 0.85 (0.39,0.96)   | 0.96 (0.98, 0.97) | 0.87 (0.84, 0.90) | 0.67 (-2.14, 0.96) |
| Max. unassisted opening                               | 0.93 (0.73, 0.98)  | 0.99 (0.98, 0.99) | 0.92 (0.91, 0.94) | 0.97 (0.68, 0.99)  |
| Max. assisted opening                                 | 0.97 (0.87, 0.99)  | 0.99 (0.98, 0.99) | 0.92 (0.91, 0.94) | 0.88 (-0.16, 0.99) |
| <b>Lateral at both sites and protrusive movements</b> |                    |                   |                   |                    |
| Right lateral                                         | 0.78 (-0.09, 0.96) | 0.69 (0.43, 0.85) | 0.89 (0.85, 0.92) | 0.95 (0.53, 0.99)  |
| Left lateral                                          | 0.83 (0.31, 0.96)  | 0.46 (0.34, 0.55) | 0.91 (0.89, 0.93) | 0.95 (0.52, 0.99)  |
| Protrusion                                            | 0.85 (0.38, 0.96)  | 0.87 (0.84,0.90)  | 0.88 (0.83, 0.93) | 0.96 (0.62, 0.99)  |
