# Supplementary material for: Prevalence of temporomandibular disorder in children and adolescents with juvenile idiopathic arthritis – a Norwegian cross- sectional multicentre study
Source: Springer Nature journal article supplement (doi:10.1186/s12903-020-01234-z), 2020-10-13
Supplement: MOESM2 [file 18479332]

Supplementary Table S2. Percent agreement values between “a reference” and the examiners

Test 1 (2015 Jan) shows percent agreement values between “a reference” and the examiner who examined the first participants included in the study. Test 2 (2015 Sep), Test 3 (2017 Feb), and Test 4 (2017 Nov) are all based on percent agreement values between “a reference” and other examiners.

|                                 | Test 1 |          | Test 2 |             | Test 3 |             | Test 4 |          |
|---------------------------------|--------|----------|--------|-------------|--------|-------------|--------|----------|
|                                 | Total  | n (%)    | Total  | n (%)       | Total  | n (%)       | Total  | n (%)    |
| M. temporalis <sup>1</sup>      |        |          |        |             |        |             |        |          |
| Posterior                       | 20     | 19 (95)  | 19.3   | 18.0 (93.3) | 16.0   | 14.5 (90.9) | 10     | 9 (90)   |
| Middle                          | 20     | 18 (90)  | 19.0   | 16.3 (85.9) | 16.0   | 14.0 (87.5) | 10     | 10 (100) |
| Anterior                        | 20     | 20 (100) | 18.0   | 14.3 (79.6) | 16.0   | 13.5 (84.4) | 10     | 6 (60)   |
| M. masseter <sup>2</sup>        |        |          |        |             |        |             |        |          |
| Origin                          | 20     | 20 (100) | 19.7   | 14.7 (74.6) | 15.0   | 14.0 (93.3) | 10     | 8 (80)   |
| Body                            | 20     | 19 (90)  | 19.7   | 15.7 (79.7) | 15.0   | 11.0 (73.3) | 10     | 10 (100) |
| Insertion                       | 20     | 20 (100) | 18     | 12.7 (70.6) | 15.0   | 12.5 (83.3) | 10     | 9 (90)   |
| Lateral pol (both sides)        | 20     | 20 (100) | 20     | 14.7 (73.5) | 16.0   | 14.5 (90.6) | 10     | 7 (70)   |
| Around lateral pol (both sides) | 20     | 20 (100) | 20     | 14.3 (71.5) | 16.0   | 10.0 (62.5) | 10     | 9 (90)   |

<sup>1</sup>3 vertical zones together (both sides). <sup>2</sup>3 horizontal zones together (both sides).
